# Supplementary material
Source: PubMed Central journal article supplement (PMC3911179)
Supplement: JB.01104-13_zjb999093033so1.pdf [file JB.01104-13_zjb999093033so1.pdf]

**Supplemental Table 1** Bacterial strains and Plasmids.

| Strain or plasmid      | Characteristics                                                             | Resistance  | Reference                    |
|------------------------|-----------------------------------------------------------------------------|-------------|------------------------------|
| <i>Sinorhizobium</i>   |                                                                             |             |                              |
| <i>melloti</i> strains |                                                                             |             |                              |
| Rm1021                 | SU47 str-21 (wild type)                                                     | Sm          | Yuan et al.,<br>2006         |
| RmP110                 | Rm1021 with wild-type <i>pstC</i>                                           | Sm          | Yuan et al.,<br>2006         |
| RmH940                 | RmG212 ( <i>lac</i> ) derivative with FRT sites flanking Tn5-235            | Sm Nm       | Chain and<br>Finan<br>unpub. |
| RmP926 (A101)          | pTH1522 (nt 9549-10988), pTH1937 (nt 1283082-1284751)                       | Sm Nm Gm    | This study                   |
| RmP928 (ΔA102)         | RmP927 with pTH1522 (nt 9549-10988), pTH1937 (nt 47717-48842), pTH1944      | Sm Tc       | This study                   |
| RmP930 (ΔA103)         | RmP929 with pTH1522 (nt 90324-92124), pTH1937 (nt 47717-48842), pTH1944     | Sm Nm Gm Tc | This study                   |
| RmP932 (ΔA104)         | RmP931 with pTH1522 (nt 90324-92124), pTH1937 (nt 123788–125128), pTH1944   | Sm Tc       | This study                   |
| RmP934 (ΔA105)         | RmP933 with pTH1522 (nt 184519-186200), pTH1937 (nt 123788–125128), pTH1944 | Sm Nm Gm Tc | This study                   |

|                          |                                                                                      |             |            |
|--------------------------|--------------------------------------------------------------------------------------|-------------|------------|
| RmP936 ( $\Delta$ A106)  | RmP935 with pTH1522 (nt 184519-186200), pTH1937 (nt 250917-251809), pTH1944          | Sm Tc       | This study |
| RmP1969 (A257)           | pTH1522 (nt 262769-264696), pTH1937 (nt 254828-255655)                               | Sm Nm Gm    | This study |
| RmP2681 ( $\Delta$ A160) | $\Phi\Delta$ A105(nt 123788-186200) $\rightarrow\Delta$ A102(nt 9549-48842), pTH1944 | Sm Gm       | This study |
| RmP979 ( $\Delta$ A109)  | RmP978 with pTH1522 (nt 311877-313654), pTH1937 (nt 250917-251809), pTH1944          | Sm Nm Gm Tc | This study |
| RmP991 ( $\Delta$ A116)  | RmP990 with pTH1522 (nt 311877-313654), pTH1937 (nt 458916-459668), pTH1944          | Sm Tc       | This study |
| RmP939 ( $\Delta$ A117)  | RmP938 with pTH1522 (nt 400267-402136), pTH1937 (nt 458916-459668)                   | Sm Tc       | This study |
| RmP941 ( $\Delta$ A118)  | RmP940 with pTH1522 (nt 505335-507338), pTH1937 (nt 458916-459668), pTH1944          | Sm Nm Gm Tc | This study |
| RmP943 ( $\Delta$ A119)  | RmP942 with pTH1522 (nt 505335-507338), pTH1937 (nt 575671-577241), pTH1944          | Sm Tc       | This study |
| RmP945 ( $\Delta$ A120)  | RmP944 with pTH1522 (nt 623673-624863), pTH1937 (nt 575671-577241), pTH1944          | Sm Nm Gm Tc | This study |
| RmP947 ( $\Delta$ A121)  | RmP946 with pTH1522 (nt 623673-624863), pTH1937 (nt 677157-678150), pTH1944          | Sm Tc       | This study |
| RmP949 ( $\Delta$ A122)  | RmP948 with pTH1522 (nt 726673-727921), pTH1937 (nt 677157-678150), pTH1944          | Sm Nm Gm Tc | This study |
| RmP951 ( $\Delta$ A123)  | RmP950 with pTH1522 (nt 726673-727921), pTH1937 (nt 774293-775476), pTH1944          | Sm Tc       | This study |
| RmP953 ( $\Delta$ A124)  | RmP952 with pTH1522 (nt 828417-830143), pTH1937 (nt 774293-775476), pTH1944          | Sm Nm Gm Tc | This study |
| RmP955 ( $\Delta$ A125)  | RmP954 with pTH1522 (nt 828417-830143), pTH1937 (nt 879960-881169), pTH1944          | Sm Tc       | This study |

|                          |                                                                                                |             |            |
|--------------------------|------------------------------------------------------------------------------------------------|-------------|------------|
| RmP971 ( $\Delta$ A126)  | RmP970 with pTH1522 (nt 926857-928282), pTH1937 (nt 879960-881169), pTH1944                    | Sm Nm Gm Tc | This study |
| RmP969 ( $\Delta$ A127)  | RmP968 with pTH1522 (nt 930000-930910), pTH1937 (nt 879960-881169)                             | Sm Nm Gm Tc | This study |
| RmP957 ( $\Delta$ A128)  | RmP956 with pTH1522 (nt 924516-927009), pTH1937 (nt 1063642-1064644), pTH1944                  | Sm Tc       | This study |
| RmP959 ( $\Delta$ A129)  | RmP958 with pTH1522 (nt 1122176-1123504), pTH1937 (nt 1063642-1064644), pTH1944                | Sm Nm Gm Tc | This study |
| RmP961 ( $\Delta$ A130)  | RmP960 with pTH1522 (nt 1122176-1123504), pTH1937 (nt 1173115-1173730), pTH1944                | Sm Tc       | This study |
| RmP967 ( $\Delta$ A131)  | RmP966 with pTH1522 (nt 1231998-1232916), pTH1937 (nt 1173115-1173730), pTH1944                | Sm Nm Gm Tc | This study |
| RmP965 ( $\Delta$ A132)  | RmP964 with pTH1522 (nt 1231998-1232916), pTH1937 (nt 1283082-1284751), pTH1944                | Sm Tc       | This study |
| RmP963 ( $\Delta$ A133)  | RmP962 with pTH1522 (nt 1348238-1349931), pTH1937 (nt 1283082-1284751), pTH1944                | Sm Nm Gm Tc | This study |
| RmP1051 (A134)           | pTH1522 (nt 90324-92124), pTH1937 (nt 1283082-1284751)                                         | Sm Nm Gm    | This study |
| RmP1052 (A135)           | pTH1522 (nt 1348238-1349931), pTH1937 (nt 47717-48842)                                         | Sm Nm Gm    | This study |
| RmP1099 ( $\Delta$ A150) | RmP1094 with $\Phi$ RmP969 (nt 879960-930910) $\rightarrow$ RmP936 (nt 184519–251809), pTH1944 | Sm Gm Tc    | This study |
| RmP1408 ( $\Delta$ A152) | RmP1407 with $\Phi$ RmP959 (nt1063642-1123504) $\rightarrow$ RmP939(nt 400267–459668), pTH1944 | Sm Gm Tc    | This study |
| RmP794 ( $\Delta$ B102)  | RmP727 with pTH1522 (nt 752548–753564), pTH1937 (nt 788035–788984), pTH1944                    | Sm Tc       | This study |
| RmP793 ( $\Delta$ B104)  | RmP726 with pTH1522 (nt 829221–830108), pTH1937 (nt 869642–870505), pTH1944                    | Sm Tc       | This study |

|                |                                                                                 |             |            |
|----------------|---------------------------------------------------------------------------------|-------------|------------|
| RmP808 (ΔB106) | RmP807 with pTH1522 (nt1091104–1092289), pTH1937 (nt 869642–870505), pTH1944    | Sm Nm Gm Tc | This study |
| RmP791 (ΔB107) | RmP724 with pTH1522 (nt 1091104–1092289), pTH1937 (nt 1129758–1131168), pTH1944 | Sm Tc       | This study |
| RmP790 (ΔB108) | RmP723 with pTH1522 (nt 1169073–1170466), pTH1937 (nt 1129758–1131168), pTH1944 | Sm Nm Gm Tc | This study |
| RmP799 (ΔB109) | RmP733 with pTH1522 (nt 1169073–1170466), pTH1937 (nt 1204770–1207052), pTH1944 | Sm Tc       | This study |
| RmP734 (B110)  | pTH1522 (nt 1255032–1256503), pTH1937 (nt 1204770–1207052), pTH1944             | Sm Nm Gm    | This study |
| RmP823 (ΔB112) | RmP822 with pTH1522 (nt 1224621–1226491), pTH1937 (nt 1204770–1207052), pTH1944 | Sm Nm Gm Tc | This study |
| RmP801 (ΔB116) | RmP800 with pTH1522 (nt 1255032–1256503), pTH1937 (nt 1307752–1308912), pTH1944 | Sm Tc       | This study |
| RmP809 (B117)  | pTH1522 (nt 1307905–1308912), pTH1937 (nt 1528150–1529711)                      | Sm Nm Gm    | This study |
| RmP811 (ΔB118) | RmP810 with pTH1522 (nt 1322226–1323078), pTH1937 (nt 1528150–1529711), pTH1944 | Sm Tc       | This study |
| RmP896 (B158)  | pTH1522 (nt 1322226–1323078), pTH1937 (nt 1307752–1308912)                      | Sm Nm Gm    | This study |
| RmP798 (ΔB122) | RmP732 with pTH1522 (nt 1572422–1573735), pTH1937 (nt 1528150–1529711), pTH1944 | Sm Nm Gm Tc | This study |
| RmP806 (ΔB123) | RmP805 with pTH1522 (nt 1652558–1654191), pTH1937 (1528150–1529711), pTH1944    | Sm Nm Gm Tc | This study |
| RmP803 (ΔB124) | RmP802 with pTH1522 (nt 1652558–1654191), pTH1937 (nt 1677882–1679723), pTH1944 | Sm Tc       | This study |
| RmP804 (B125)  | pTH1522 (nt 59089–60148), pTH1937 (nt 1677882–1679723)                          | Sm Nm Gm    | This study |

|                          |                                                                                                                                                      |             |            |
|--------------------------|------------------------------------------------------------------------------------------------------------------------------------------------------|-------------|------------|
| RmP1055 ( $\Delta$ B161) | RmP1054 with pTH1522 (nt 1677882–1679723), pTH1937 (nt 49523–51610), pTH1944                                                                         | Sm Tc       | This study |
| RmP899 (B140)            | pTH1522 (nt 64141–65620), pTH1937 (nt 466499–467160)                                                                                                 | Sm Nm Gm    | This study |
| RmP876 ( $\Delta$ B141)  | RmP875 with pTH1522 (nt 100636–101396), pTH1937 (nt 466499–467160), pTH1944                                                                          | Sm Tc       | This study |
| RmP3181 ( $\Delta$ B163) | RmP3180 with pTH1522 (nt 466499–467007), pTH1937 (nt 635019–635940), pTH1944                                                                         | Sm Nm Gm Tc | This study |
| RmP880 ( $\Delta$ B146)  | RmP879 with pTH1522 (nt 752548–755260), pTH1937 (nt 635019–635940), pTH1944                                                                          | Sm Nm Gm Tc | This study |
| RmP884 ( $\Delta$ B148)  | RmP883 with pTH1522 (nt 762942–764540), pTH1937 (nt 635019–635940), pTH1944                                                                          | Sm Nm Gm Tc | This study |
| RmP2746 ( $\Delta$ B180) | RmP2714 with pTH1522 (nt 220005–221266), pTH1937 (nt 100636–101396) → (RmP1108 with pTH1522 (nt 678812–679659), pTH1937 (nt 635019–635940) → RmP874) | Sm Sp Nm Tc | This study |
| RmP874 ( $\Delta$ B139)  | RmP873 with pTH1522 (nt 869642–870505), pTH1937 (nt 739934–740722), pTH1944                                                                          | Sm Nm Gm Tc | This study |
| RmP869 ( $\Delta$ B136)  | RmP868 with pTH1522 (nt 762942–764540), pTH1937 (nt 869642–870505), pTH1944                                                                          | Sm Tc       | This study |
| RmP867 ( $\Delta$ B135)  | RmP866 with pTH1522 (nt 769971–771070), pTH1937 (nt 869642–870505), pTH1944                                                                          | Sm Tc       | This study |
| RmP2371                  | RmP110 (pTH2623)                                                                                                                                     | Sm Sp       | This study |
| RmP2372                  | RmP110 (pTH2625)                                                                                                                                     | Sm Sp       | This study |
| RmP2380                  | RmP110 (pTH2624)                                                                                                                                     | Sm Sp       | This study |

|          |                                                                                |             |                               |
|----------|--------------------------------------------------------------------------------|-------------|-------------------------------|
| RmP2381  | RmP110 (pTH1931)                                                               | Sm Sp       | This study                    |
| RmP2374  | RmP110 (pTH2647)                                                               | Sm Sp       | This study                    |
| RmP2373  | RmP110 (pTH2646)                                                               | Sm Sp       | This study                    |
| RmP2370  | RmP110 (pTH2622)                                                               | Sm Sp       | This study                    |
| RmP2451  | RmP110 (pTH2563)                                                               | Sm Sp       | This study                    |
| RmP2908  | RmP110 (pTH2790)                                                               | Sm Sp       | This study                    |
| RmP3142  | RmP110 (pTH2830)                                                               | Sm Sp       | This study                    |
| RmFL4094 | pTH1522 (nt1231998 -1232916)                                                   | Sm Gm       | Cowie <i>et al.</i><br>(2006) |
| RmP2141  | RmP1969 with pTH1522 (nt 276987-264696), pTH1937 (nt 254828-255655), pTH2563   | Sm Nm Gm Sp | This study                    |
| RmP2195  | RmP1969 with pTH1522 (nt 276987-264696), pTH1937 (nt 254828-255655), pTH1931   | Sm Nm Gm Sp | This study                    |
| RmP2200  | RmP956 with pTH1522 (nt 924516-927009), pTH1937 (nt 1063642-1064644), pTH2563  | Sm Nm Gm Sp | This study                    |
| RmP2143  | RmP926 with pTH1522 (nt 9549-10988), pTH1937 (nt 1283082-1284751), pTH2563     | Sm Nm Gm Sp | This study                    |
| RmP3178  | RmP896 with pTH1522 (nt 1322226–1323078), pTH1937 (nt1307752–1308912), pTH2563 | Sm Nm Gm Sp | This study                    |

|         |                                                                                  |             |            |
|---------|----------------------------------------------------------------------------------|-------------|------------|
| RmP2352 | RmP966 with pTH1522 (nt 1231998-1232916), pTH1937 (nt 1173115-1173730), pTH2646  | Sm Nm Gm Sp | This study |
| RmP3179 | RmP966 with pTH1522 (nt 1231998-1232916), pTH1937 (nt 1173115-1173730), pTH1931  | Sm Nm Gm Sp | This study |
| RmP2494 | RmP926 with pTH1522 (nt 9549-10988), pTH1937 (1283082-1284751), pTH2646          | Sm Nm Gm Sp | This study |
| RmP2495 | RmP956 with pTH1522 (nt 924516-927009), pTH1937 (nt 1063642-1064644), pTH2646    | Sm Nm Gm Sp | This study |
| RmP2496 | RmP896 with pTH1522 (nt1322226–1323078), pTH1937 (nt 1307752–1308912), pTH2646   | Sm Nm Gm Sp | This study |
| RmP2619 | RmP2500 with pTH1522 (nt 1283082-1284751), pTH1937 (nt 1231998-1232916), pTH2623 | Sm Nm Gm Sp | This study |
| RmP2620 | RmP2500 with pTH1522 (nt 1283082-1284751), pTH1937 (nt 1231998-1232916), pTH1931 | Sm Nm Gm Sp | This study |
| RmP2659 | RmP926 with pTH1522 (nt 9549-10988), pTH1937 (nt 1283082-1284751), pTH2623       | Sm Nm Gm Sp | This study |
| RmP2660 | RmP956 with pTH1522 (nt 924516-927009), pTH1937 (nt 1063642-1064644), pTH2623    | Sm Nm Gm Sp | This study |
| RmP2661 | RmP896 with pTH1522 (nt1322226–1323078), pTH1937 (nt1307752 – 1308912), pTH2623  | Sm Nm Gm Sp | This study |
| RmP3116 | RmP2695 with pTH1522 (nt 869642–870505), pTH1937 (nt 739934 – 740722), pTH2830   | Sm Nm Gm Sp | This study |
| RmP3143 | RmP2695 with pTH1522 (nt 869642–870505), pTH1937 (nt 739934 – 740722), pTH1931   | Sm Nm Gm Sp | This study |
| RmP3169 | RmP896 with pTH1522 (nt1322226–1323078), pTH1937 (nt 1307752–1308912), pTH2830   | Sm Nm Gm Sp | This study |
| RmP3171 | RmP926 with pTH1522 (nt 9549-10988), pTH1937 (nt 1283082-1284751), pTH2830       | Sm Nm Gm Sp | This study |

|          |                                                                               |             |                                |
|----------|-------------------------------------------------------------------------------|-------------|--------------------------------|
| RmP3173  | RmP956 with pTH1522 (nt 924516-927009), pTH1937 (nt 1063642-1064644), pTH2830 | Sm Nm Gm Sp | This study                     |
| Plasmids |                                                                               |             |                                |
| pMS101   | vector containing FRT site within multiple cloning site                       | Cm          | Snaith 1995                    |
| pTH472   | <i>flp</i> delivery vector derivative of pMP220                               | Gm          | Chain & Finan<br>unpub         |
| pTH1360  | pUC119 derivative with <i>oriT</i> from RP4 and <i>gusA</i> from pFus1        | Ap Nm       | Finan & Zaheer,<br>unpublished |
| pTH1522  | reporter vector containing FRT site                                           | Gm          | Cowie <i>et al.</i><br>(2006)  |
| pTH1919  | pBBR MCS-3 derivative with RK2- <i>tetR-tetA</i>                              | Tc          | Cheng & Finan<br>unpub         |
| pTH1931  | expression vector pTrcSC derivative of pTrcStrep                              | Sm Sp       | C. Baron,<br>unpublished       |
| pTH1937  | $\Delta$ Tn903 inverted repeats, pRK2 <i>oriT</i> , <i>nptII</i> from Tn5     | Km Nm       | This study                     |
| pTH1944  | <i>flp</i> gene in a pBBR MCS-3 derivative with RK2- <i>tetR-tetA</i>         | Tc          | This study                     |
| pTH1998  | pACYC177 derivative with <i>EcoRI/SphI</i> fragment containing MCS            | Km Nm       | This study                     |
| pTH1999  | pTH1998 with <i>SphI/BglII</i> fragment from pMS101 containing FRT site       | Km Nm       | This study                     |



|         |                                                                                               |       |            |
|---------|-----------------------------------------------------------------------------------------------|-------|------------|
| pTH2000 | $\Delta$ Tn903 inverted repeats in pTH1999                                                    | Km Nm | This study |
| pTH2001 | pTH2000 with <i>NcoI/NheI</i> fragment from pTH1360 containing the <i>oriT</i> site from pRK2 | Km Nm | This study |
| pTH2563 | pTH1931 with <i>PacI</i> fragment of <i>sma0471/sma0473</i> (nt 257565 - 258837)              | Sm Sp | This study |
| pTH2622 | pTH1931 with <i>PacI</i> fragment of <i>sma2151</i> (nt 1214806 - 1215645)                    | Sm Sp | This study |
| pTH2623 | pTH1931 with <i>PacI</i> fragment of <i>sma2231</i> (nt 1248755 - 1249733)                    | Sm Sp | This study |
| pTH2624 | pTH1931 with <i>PacI</i> fragment of <i>sma2253/sma2255</i> (nt 1262710 - 1264012)            | Sm Sp | This study |
| pTH2625 | pTH1931 with <i>PacI</i> fragment of <i>sma2273/sma2275</i> (nt 1269637 - 1268234)            | Sm Sp | This study |
| pTH2646 | pTH1931 with <i>PacI</i> fragment of <i>sma2105</i> (nt 1187240 - 1189099)                    | Sm Sp | This study |
| pTH2647 | pTH1931 with <i>PacI</i> fragment of <i>sma2133</i> (nt 1205426 - 1206839)                    | Sm Sp | This study |
| pTH2790 | pTH1931 with <i>PacI</i> fragment of (nt 1187240 – 1187703)                                   | Sm Sp | This study |
| pTH2830 | pTH1931 with <i>PacI</i> fragment of (nt 766418 - 767440)                                     | Sm Sp | This study |

---

**Supplemental Table 2:** Primers employed for amplification of TA genes

| Plasmid name | Gene               | Primer name and sequence                 | Primers location on pSymB | PCR prod. size |
|--------------|--------------------|------------------------------------------|---------------------------|----------------|
| pTH2563      | <i>sma0471/</i>    | TApacF CCTTAATTAACAACCTGTCCACCGCGCTTCG   | 257565nt                  | 1272bp         |
|              | <i>sma0473</i>     | TApacR CCTTAATTAAGAGTGAGGCTGCTTCTACCC    | 258837nt                  |                |
| pTH2622      | <i>sma2151</i>     | sma2151F CCTTAATTAACCGGAGATGATTGCCAA     | 1214806nt                 | 839bp          |
|              |                    | sma2151R CCTTAATTAATCCTTCTGCGGCAGTGTCC   | 1215645nt                 |                |
| pTH2623      | <i>sma2231</i>     | sma2231F CCTTAATTAACGCTCTATCCGGTCTGA     | 1248755nt                 | 978bp          |
|              |                    | sma2231R CCTTAATTAAGCAAGAGCAACGGCCATGG   | 1249733nt                 |                |
| pTH2624      | <i>sma2253/</i>    | sma53/5F CCTTAATTAATCGCGCTGCACAAACAA     | 1262710nt                 | 1303bp         |
|              | <i>sma2255</i>     | sma53/5R CCTTAATTAACATCGCGGCAGCCTGTCTTCG | 1264012nt                 |                |
| pTH2625      | <i>sma2273/</i>    | sma73/5F CCCAAGCTTGAAAGCACAACCTGGACGCGG  | 1269637nt                 | 1403bp         |
|              | <i>sma2275</i>     | sma73/5R CCTTAATTAAGTCCTGGTCGTCACCATCC   | 1268234nt                 |                |
| pTH2646      | <i>sma2105</i>     | sma105F CCTTAATTAACAGCATCGTGCCCT         | 1187240nt                 | 1859bp         |
|              |                    | sma105R CCTTAATTAACGTTTCGTTGACCTCCTA     | 1189099nt                 |                |
| pTH2647      | <i>sma2133</i>     | sma133F CCTTAATTAAGGCAAGGATGCGGAAG       | 1206839nt                 | 1414bp         |
|              |                    | sma133R CCTTAATTAATCGGGTCGATGTGACT       | 1205425nt                 |                |
| pTH2790      | Upstream region of | 105PF CCTTAATTAACAGCATCGTGCCCTTGGC       | 1187240nt                 | 463bp          |

---

|                |       |                                |           |
|----------------|-------|--------------------------------|-----------|
| <i>Sma2105</i> | 105PR | CCCAAGCTTGTCCAGTTAATAAATGAAAT- | 1187703nt |
|                |       | CCCG                           |           |

---

**Supplemental Table 3:** RNA-sequence read count data for the TA-associated genes from *S. meliloti*. The sequence read count data were obtained from *S. meliloti* P110 cells grown in MOPS minimal medium with limiting (20  $\mu$ M, P0) and excess (2 mM, P2) phosphate and from data extracted from Sallet *et al.*, 2013. These data were combined and the resulting cumulative values were used to determine the rank orders as shown in Figure 7. The *S. meliloti* TA-associated genes were from Makarova *et al.*, 2009.

| Gene     | Toxin/<br>Antitoxin<br>Class | Length | start  | end    | MOPS  |       | per site Sallet et al 2013 |               |               |                    |                    |                   |                   |               |        | cumulat.<br>value |
|----------|------------------------------|--------|--------|--------|-------|-------|----------------------------|---------------|---------------|--------------------|--------------------|-------------------|-------------------|---------------|--------|-------------------|
|          |                              |        |        |        | P0    | P2    | ExpL<br>DESEQ              | Stat<br>DESEQ | ExpL<br>DESEQ | Stat<br>DESEQ<br>Q | NodL<br>DESEQ<br>Q | N-<br>ShortD<br>Q | E-<br>Short<br>DQ | S-<br>ShortDQ |        |                   |
| SMc01110 | Xre                          | 139 aa | 445435 | 445854 | 2.384 | 1.580 | 0.602                      | 1.293         | 0.602         | 1.293              | 1.367              | 0.883             | 0.293             | 0.307         | 10.605 |                   |
| SMc04312 | RHH                          | 94 aa  | 2E+06  | 2E+06  | 1.066 | 0.777 | 0.379                      | 0.994         | 0.379         | 0.994              | 0.339              | 0.819             | 0.484             | 1.929         | 8.160  |                   |
| SMa1413  | RHH                          | 91 aa  | 777118 | 777393 | 0.563 | 0.296 | 0.321                      | 1.544         | 0.321         | 1.544              | 0.110              | 0.503             | 0.437             | 1.109         | 6.747  |                   |
| SMB20696 | COG5642                      | 161 aa | 1E+06  | 1E+06  | 0.665 | 0.558 | 0.319                      | 1.119         | 0.319         | 1.119              | 0.291              | 0.346             | 0.616             | 1.261         | 6.613  |                   |
| SMa5007  | Xre                          | 126 aa | 550344 | 550724 | 1.112 | 0.453 | 0.353                      | 1.504         | 0.353         | 1.504              | 0.186              | 0.150             | 0.250             | 0.448         | 6.313  |                   |
| SMc01857 | AbrB                         | 146 aa | 2E+06  | 2E+06  | 0.323 | 0.296 | 0.539                      | 0.720         | 0.539         | 0.720              | 0.881              | 1.190             | 0.802             | 0.275         | 6.286  |                   |
| SMc05009 | ArsR                         | 123 aa | 3E+06  | 3E+06  | 2.282 | 1.267 | 0.082                      | 0.467         | 0.082         | 0.467              | 0.000              | 0.048             | 0.215             | 0.579         | 5.490  |                   |
| SMc02461 | RelE                         | 98 aa  | 1E+06  | 1E+06  | 0.104 | 0.155 | 0.094                      | 0.886         | 0.094         | 0.886              | 0.150              | 0.534             | 0.279             | 1.733         | 4.914  |                   |
| SMc01452 | RHH                          | 80 aa  | 2E+06  | 2E+06  | 0.152 | 0.288 | 0.160                      | 0.116         | 0.160         | 0.116              | 1.598              | 1.866             | 0.374             | 0.077         | 4.907  |                   |
| SMc00178 | RelE                         | 196 aa | 2E+06  | 2E+06  | 0.733 | 0.375 | 0.276                      | 0.665         | 0.276         | 0.665              | 0.107              | 0.575             | 0.409             | 0.644         | 4.723  |                   |
| SMc00080 | ArsR                         | 227 aa | 1E+06  | 1E+06  | 0.059 | 0.039 | 0.079                      | 0.581         | 0.079         | 0.581              | 0.459              | 1.508             | 0.143             | 0.587         | 4.114  |                   |
| SMB21117 | Xre                          | 152 aa | 758135 | 758593 | 0.925 | 0.522 | 0.053                      | 0.306         | 0.053         | 0.306              | 0.155              | 0.259             | 0.322             | 1.196         | 4.099  |                   |
| SMc00348 | RHH                          | 91 aa  | 303335 | 303610 | 0.156 | 0.543 | 0.246                      | 0.229         | 0.246         | 0.229              | 0.954              | 1.059             | 0.172             | 0.143         | 3.976  |                   |
| SMc04408 | AbrB                         | 86 aa  | 4E+06  | 4E+06  | 0.303 | 0.306 | 0.087                      | 0.654         | 0.087         | 0.654              | 0.290              | 0.690             | 0.196             | 0.190         | 3.456  |                   |
| SMa0471  | RHH                          | 102 aa | 258225 | 258533 | 0.244 | 0.168 | 0.216                      | 0.717         | 0.216         | 0.717              | 0.289              | 0.314             | 0.145             | 0.155         | 3.179  |                   |

|          |         |        |        |        |       |       |       |       |       |       |       |       |       |       |       |
|----------|---------|--------|--------|--------|-------|-------|-------|-------|-------|-------|-------|-------|-------|-------|-------|
| SMc01269 | Xre     | 132 aa | 2E+06  | 2E+06  | 1.296 | 0.716 | 0.255 | 0.128 | 0.255 | 0.128 | 0.035 | 0.038 | 0.121 | 0.024 | 2.995 |
| SMc01933 | RHH     | 71 aa  | 1E+06  | 1E+06  | 0.233 | 0.126 | 0.209 | 0.637 | 0.209 | 0.637 | 0.088 | 0.143 | 0.256 | 0.292 | 2.831 |
| SMa0473  | RelE    | 97 aa  | 258530 | 258823 | 0.190 | 0.210 | 0.175 | 0.252 | 0.175 | 0.252 | 0.346 | 1.013 | 0.097 | 0.113 | 2.823 |
| SMc02716 | RHH     | 83 aa  | 3E+06  | 3E+06  | 0.281 | 0.290 | 0.346 | 0.454 | 0.346 | 0.454 | 0.091 | 0.219 | 0.160 | 0.127 | 2.767 |
| SMc02394 | Xre     | 102 aa | 1E+06  | 1E+06  | 0.096 | 0.063 | 0.095 | 0.876 | 0.095 | 0.876 | 0.160 | 0.300 | 0.052 | 0.137 | 2.750 |
| SMa1456  | COG5642 | 129 aa | 802839 | 803228 | 0.126 | 0.108 | 0.125 | 0.600 | 0.125 | 0.600 | 0.254 | 0.478 | 0.134 | 0.195 | 2.745 |
| SMc04881 | PIN     | 134 aa | 4E+06  | 4E+06  | 0.426 | 0.249 | 0.087 | 0.464 | 0.087 | 0.464 | 0.449 | 0.330 | 0.069 | 0.068 | 2.691 |
| SMB20628 | RHH     | 89 aa  | 2E+06  | 2E+06  | 0.266 | 0.290 | 0.118 | 0.467 | 0.118 | 0.467 | 0.036 | 0.263 | 0.139 | 0.488 | 2.652 |
| SMa2255  | PHD     | 112 aa | 1E+06  | 1E+06  | 0.245 | 0.262 | 0.133 | 0.389 | 0.133 | 0.389 | 0.116 | 0.164 | 0.312 | 0.490 | 2.634 |
| SMc04198 | Xre     | 229 aa | 2E+06  | 2E+06  | 0.177 | 0.290 | 0.250 | 0.233 | 0.250 | 0.233 | 0.011 | 0.093 | 0.466 | 0.571 | 2.575 |
| SMa2275  | RHH     | 91 aa  | 1E+06  | 1E+06  | 0.158 | 0.094 | 0.084 | 0.277 | 0.084 | 0.277 | 0.059 | 0.467 | 0.317 | 0.729 | 2.547 |
| SMc04431 | COG2929 | 87 aa  | 684058 | 684321 | 0.218 | 0.297 | 0.067 | 0.321 | 0.067 | 0.321 | 0.041 | 0.325 | 0.164 | 0.688 | 2.509 |
| SMc01226 | ArsR    | 96 aa  | 2E+06  | 2E+06  | 0.042 | 0.036 | 0.017 | 0.043 | 0.017 | 0.043 | 0.939 | 1.164 | 0.065 | 0.130 | 2.497 |
| SMa1990  | RHH     | 118 aa | 1E+06  | 1E+06  | 0.267 | 0.190 | 0.128 | 0.592 | 0.128 | 0.592 | 0.015 | 0.130 | 0.221 | 0.180 | 2.444 |
| SMc02477 | Xre     | 88 aa  | 3E+06  | 3E+06  | 0.165 | 0.375 | 0.190 | 0.559 | 0.190 | 0.559 | 0.057 | 0.072 | 0.162 | 0.074 | 2.403 |
| SMc00822 | RelE    | 98 aa  | 843615 | 843911 | 0.339 | 0.213 | 0.093 | 0.250 | 0.093 | 0.250 | 0.172 | 0.381 | 0.278 | 0.306 | 2.375 |
| SMc01932 | PIN     | 121 aa | 1E+06  | 1E+06  | 0.182 | 0.119 | 0.204 | 0.524 | 0.204 | 0.524 | 0.101 | 0.196 | 0.145 | 0.098 | 2.297 |
| SMc01132 | COG3832 | 152 aa | 417338 | 417796 | 0.197 | 0.087 | 0.118 | 0.729 | 0.118 | 0.729 | 0.018 | 0.098 | 0.077 | 0.123 | 2.294 |
| SMc03949 | AbrB    | 90 aa  | 3E+06  | 3E+06  | 0.203 | 0.149 | 0.091 | 0.372 | 0.091 | 0.372 | 0.012 | 0.740 | 0.070 | 0.176 | 2.277 |
| SMa2231  | PIN     | 127 aa | 1E+06  | 1E+06  | 0.006 | 0.013 | 0.172 | 0.350 | 0.172 | 0.350 | 0.244 | 0.489 | 0.206 | 0.238 | 2.240 |
| SMc00687 | PIN     | 132 aa | 3E+06  | 3E+06  | 0.291 | 0.128 | 0.219 | 0.437 | 0.219 | 0.437 | 0.097 | 0.169 | 0.111 | 0.073 | 2.182 |
| SMc01957 | Xre     | 104 aa | 3E+06  | 3E+06  | 0.199 | 0.105 | 0.048 | 0.185 | 0.048 | 0.185 | 0.629 | 0.550 | 0.089 | 0.050 | 2.086 |
| SMa1924  | Xre     | 224 aa | 1E+06  | 1E+06  | 0.119 | 0.138 | 0.083 | 0.306 | 0.083 | 0.306 | 0.446 | 0.375 | 0.111 | 0.107 | 2.072 |
| SMc02988 | RHH     | 79 aa  | 3E+06  | 3E+06  | 0.162 | 0.104 | 0.151 | 0.336 | 0.151 | 0.336 | 0.078 | 0.178 | 0.195 | 0.356 | 2.046 |

|          |         |        |        |        |       |       |       |       |       |       |       |       |       |       |       |
|----------|---------|--------|--------|--------|-------|-------|-------|-------|-------|-------|-------|-------|-------|-------|-------|
| SMc02151 | Xre     | 110 aa | 560247 | 560579 | 0.283 | 0.405 | 0.384 | 0.146 | 0.384 | 0.146 | 0.005 | 0.062 | 0.119 | 0.009 | 1.942 |
| SMB20412 | PIN     | 54 aa  | 426973 | 427137 | 0.149 | 0.110 | 0.052 | 0.233 | 0.052 | 0.233 | 0.075 | 0.614 | 0.106 | 0.317 | 1.939 |
| SMc00823 | Xre     | 131 aa | 843911 | 844306 | 0.308 | 0.160 | 0.076 | 0.419 | 0.076 | 0.419 | 0.158 | 0.093 | 0.058 | 0.155 | 1.921 |
| SMB20627 | RelE    | 112 aa | 2E+06  | 2E+06  | 0.186 | 0.163 | 0.119 | 0.298 | 0.119 | 0.298 | 0.034 | 0.260 | 0.205 | 0.216 | 1.899 |
| SMA2253  | PIN     | 125 aa | 1E+06  | 1E+06  | 0.233 | 0.223 | 0.086 | 0.371 | 0.086 | 0.371 | 0.080 | 0.289 | 0.067 | 0.069 | 1.875 |
| SMc03842 | COG3832 | 119 aa | 4E+06  | 4E+06  | 0.111 | 0.209 | 0.034 | 0.034 | 0.034 | 0.034 | 0.326 | 0.738 | 0.146 | 0.193 | 1.858 |
| SMc03998 | ArsR    | 86 aa  | 3E+06  | 3E+06  | 0.338 | 0.136 | 0.181 | 0.037 | 0.181 | 0.037 | 0.009 | 0.286 | 0.593 | 0.057 | 1.855 |
| SMc02476 | RelE    | 92 aa  | 3E+06  | 3E+06  | 0.143 | 0.221 | 0.087 | 0.227 | 0.087 | 0.227 | 0.000 | 0.140 | 0.325 | 0.337 | 1.796 |
| SMc01176 | AbrB    | 76 aa  | 2E+06  | 2E+06  | 0.359 | 0.207 | 0.108 | 0.193 | 0.108 | 0.193 | 0.023 | 0.188 | 0.196 | 0.158 | 1.732 |
| SMB20935 | Xre     | 83 aa  | 1E+06  | 1E+06  | 0.607 | 0.694 | 0.083 | 0.015 | 0.083 | 0.015 | 0.068 | 0.078 | 0.049 | 0.014 | 1.706 |
| SMB20413 | RHH     | 75 aa  | 427134 | 427361 | 0.203 | 0.083 | 0.081 | 0.455 | 0.081 | 0.455 | 0.054 | 0.012 | 0.129 | 0.147 | 1.699 |
| SMA0572  | RelE    | 107 aa | 304557 | 304880 | 0.219 | 0.258 | 0.074 | 0.104 | 0.074 | 0.104 | 0.321 | 0.357 | 0.097 | 0.074 | 1.680 |
| SMc01995 | RelE    | 128 aa | 3E+06  | 3E+06  | 0.064 | 0.080 | 0.052 | 0.189 | 0.052 | 0.189 | 0.274 | 0.459 | 0.090 | 0.199 | 1.651 |
| SMc00740 | RHH     | 94 aa  | 3E+06  | 3E+06  | 0.191 | 0.122 | 0.025 | 0.142 | 0.025 | 0.142 | 0.313 | 0.535 | 0.057 | 0.098 | 1.648 |
| SMB20062 | RHH     | 82 aa  | 72518  | 72766  | 0.136 | 0.097 | 0.095 | 0.321 | 0.095 | 0.321 | 0.042 | 0.275 | 0.120 | 0.144 | 1.646 |
| SMc04162 | ArsR    | 109 aa | 2E+06  | 2E+06  | 0.134 | 0.078 | 0.062 | 0.144 | 0.062 | 0.144 | 0.071 | 0.376 | 0.228 | 0.321 | 1.620 |
| SMB20063 | RelE    | 98 aa  | 72756  | 73052  | 0.166 | 0.086 | 0.119 | 0.246 | 0.119 | 0.246 | 0.051 | 0.268 | 0.158 | 0.141 | 1.601 |
| SMc04432 | RHH     | 105 aa | 684318 | 684635 | 0.142 | 0.095 | 0.063 | 0.332 | 0.063 | 0.332 | 0.064 | 0.369 | 0.035 | 0.054 | 1.549 |
| SMB21008 | ArsR    | 110 aa | 1E+06  | 1E+06  | 0.564 | 0.330 | 0.086 | 0.142 | 0.086 | 0.142 | 0.015 | 0.024 | 0.057 | 0.065 | 1.511 |
| SMc03206 | COG3832 | 217 aa | 3E+06  | 3E+06  | 0.031 | 0.025 | 0.023 | 0.400 | 0.023 | 0.400 | 0.013 | 0.031 | 0.031 | 0.487 | 1.465 |
| SMc02715 | PIN     | 142 aa | 3E+06  | 3E+06  | 0.146 | 0.170 | 0.128 | 0.222 | 0.128 | 0.222 | 0.100 | 0.221 | 0.068 | 0.035 | 1.439 |
| SMA0981  | PIN     | 139 aa | 546465 | 546884 | 0.086 | 0.117 | 0.124 | 0.237 | 0.124 | 0.237 | 0.096 | 0.164 | 0.094 | 0.156 | 1.435 |
| SMc03151 | Xre     | 232 aa | 3E+06  | 3E+06  | 0.144 | 0.274 | 0.233 | 0.044 | 0.233 | 0.044 | 0.040 | 0.186 | 0.143 | 0.082 | 1.422 |
| SMB21169 | ArsR    | 141 aa | 916402 | 916827 | 0.111 | 0.096 | 0.021 | 0.105 | 0.021 | 0.105 | 0.334 | 0.448 | 0.070 | 0.069 | 1.378 |

|          |         |        |        |        |       |       |       |       |       |       |       |       |       |       |       |
|----------|---------|--------|--------|--------|-------|-------|-------|-------|-------|-------|-------|-------|-------|-------|-------|
| SMa1076  | Xre     | 194 aa | 587855 | 588439 | 0.298 | 0.417 | 0.081 | 0.057 | 0.081 | 0.057 | 0.050 | 0.106 | 0.164 | 0.062 | 1.375 |
| SMc00900 | PIN     | 128 aa | 882944 | 883330 | 0.159 | 0.090 | 0.060 | 0.126 | 0.060 | 0.126 | 0.079 | 0.396 | 0.125 | 0.133 | 1.355 |
| SMc01836 | Xre     | 105 aa | 3E+06  | 3E+06  | 0.106 | 0.088 | 0.072 | 0.223 | 0.072 | 0.223 | 0.208 | 0.192 | 0.082 | 0.072 | 1.339 |
| SMa0193  | ArsR    | 108 aa | 106326 | 106652 | 0.185 | 0.320 | 0.009 | 0.026 | 0.009 | 0.026 | 0.046 | 0.328 | 0.084 | 0.255 | 1.289 |
| SMc00899 | RHH     | 84 aa  | 883330 | 883584 | 0.189 | 0.112 | 0.039 | 0.093 | 0.039 | 0.093 | 0.151 | 0.327 | 0.095 | 0.142 | 1.280 |
| SMc02982 | PIN     | 196 aa | 3E+06  | 3E+06  | 0.024 | 0.069 | 0.334 | 0.010 | 0.334 | 0.010 | 0.037 | 0.054 | 0.333 | 0.017 | 1.223 |
| SMc01521 | PIN     | 134 aa | 3E+06  | 3E+06  | 0.099 | 0.069 | 0.074 | 0.237 | 0.074 | 0.237 | 0.023 | 0.091 | 0.092 | 0.216 | 1.213 |
| SMc00392 | PHD     | 80 aa  | 343262 | 343504 | 0.127 | 0.214 | 0.113 | 0.134 | 0.113 | 0.134 | 0.048 | 0.028 | 0.191 | 0.096 | 1.198 |
| SMc04222 | RHH     | 96 aa  | 2E+06  | 2E+06  | 0.155 | 0.088 | 0.068 | 0.161 | 0.068 | 0.161 | 0.096 | 0.158 | 0.101 | 0.130 | 1.188 |
| SMc02888 | Xre     | 340 aa | 243152 | 244174 | 0.012 | 0.012 | 0.073 | 0.404 | 0.073 | 0.404 | 0.020 | 0.029 | 0.048 | 0.084 | 1.159 |
| SMa5006  | PIN     | 119 aa | 510778 | 511137 | 0.171 | 0.132 | 0.088 | 0.108 | 0.088 | 0.108 | 0.194 | 0.088 | 0.062 | 0.119 | 1.157 |
| SMB21007 | COG3832 | 139 aa | 1E+06  | 1E+06  | 0.217 | 0.093 | 0.086 | 0.199 | 0.086 | 0.199 | 0.067 | 0.045 | 0.087 | 0.054 | 1.132 |
| SMa0548  | RHH     | 79 aa  | 291638 | 291877 | 0.222 | 0.207 | 0.165 | 0.064 | 0.165 | 0.064 | 0.008 | 0.120 | 0.102 | 0.014 | 1.132 |
| SMc00075 | GNAT    | 203aa  | 1E+06  | 1E+06  | 0.119 | 0.091 | 0.050 | 0.039 | 0.050 | 0.039 | 0.039 | 0.345 | 0.217 | 0.135 | 1.123 |
| SMc03843 | ArsR    | 104 aa | 4E+06  | 4E+06  | 0.264 | 0.218 | 0.025 | 0.049 | 0.025 | 0.049 | 0.135 | 0.253 | 0.033 | 0.057 | 1.106 |
| SMc01842 | ArsR    | 340 aa | 3E+06  | 3E+06  | 0.124 | 0.095 | 0.161 | 0.153 | 0.161 | 0.153 | 0.015 | 0.039 | 0.163 | 0.040 | 1.105 |
| SMc01762 | Xre     | 111 aa | 1E+06  | 1E+06  | 0.156 | 0.222 | 0.149 | 0.044 | 0.149 | 0.044 | 0.103 | 0.035 | 0.167 | 0.028 | 1.098 |
| SMB21651 | PIN     | 137 aa | 2E+06  | 2E+06  | 0.035 | 0.047 | 0.058 | 0.054 | 0.058 | 0.054 | 0.086 | 0.568 | 0.059 | 0.055 | 1.075 |
| SMc02639 | ArsR    | 110 aa | 1E+06  | 1E+06  | 0.031 | 0.066 | 0.032 | 0.027 | 0.032 | 0.027 | 0.050 | 0.658 | 0.047 | 0.042 | 1.012 |
| SMc02313 | HicB    | 118 aa | 684838 | 685194 | 0.063 | 0.055 | 0.054 | 0.166 | 0.054 | 0.166 | 0.099 | 0.161 | 0.142 | 0.047 | 1.006 |
| SMc00479 | Xre     | 338 aa | 2E+06  | 2E+06  | 0.152 | 0.040 | 0.088 | 0.194 | 0.088 | 0.194 | 0.079 | 0.038 | 0.063 | 0.065 | 1.001 |
| SMB21127 | COG5642 | 123 aa | 766495 | 766866 | 0.047 | 0.095 | 0.172 | 0.080 | 0.172 | 0.080 | 0.070 | 0.115 | 0.096 | 0.074 | 1.000 |
| SMc04169 | ArsR    | 334 aa | 2E+06  | 2E+06  | 0.620 | 0.178 | 0.052 | 0.020 | 0.052 | 0.020 | 0.000 | 0.017 | 0.030 | 0.006 | 0.994 |
| SMa2273  | RelE    | 116 aa | 1E+06  | 1E+06  | 0.067 | 0.045 | 0.064 | 0.138 | 0.064 | 0.138 | 0.055 | 0.211 | 0.097 | 0.101 | 0.980 |

|           |         |        |        |        |       |       |       |       |       |       |       |       |       |       |       |
|-----------|---------|--------|--------|--------|-------|-------|-------|-------|-------|-------|-------|-------|-------|-------|-------|
| SMa0967   | HEPN    | 306 aa | 539831 | 540751 | 0.320 | 0.254 | 0.060 | 0.061 | 0.060 | 0.061 | 0.010 | 0.029 | 0.084 | 0.028 | 0.968 |
| SMc00686  | AbrB    | 77 aa  | 3E+06  | 3E+06  | 0.092 | 0.064 | 0.081 | 0.183 | 0.081 | 0.183 | 0.033 | 0.082 | 0.100 | 0.054 | 0.954 |
| SMc02620  | Xre     | 243 aa | 111802 | 112533 | 0.064 | 0.135 | 0.135 | 0.159 | 0.135 | 0.159 | 0.011 | 0.032 | 0.059 | 0.044 | 0.933 |
| SMc02638  | ArsR    | 160 aa | 1E+06  | 1E+06  | 0.040 | 0.051 | 0.033 | 0.189 | 0.033 | 0.189 | 0.158 | 0.142 | 0.035 | 0.035 | 0.907 |
| S Mb20695 | COG5654 | 168 aa | 1E+06  | 1E+06  | 0.091 | 0.074 | 0.056 | 0.114 | 0.056 | 0.114 | 0.084 | 0.170 | 0.085 | 0.057 | 0.902 |
| S Mb21035 | Xre     | 72 aa  | 653580 | 653798 | 0.258 | 0.251 | 0.095 | 0.071 | 0.095 | 0.071 | 0.000 | 0.017 | 0.032 | 0.011 | 0.901 |
| SMc00694  | RelE    | 100 aa | 3E+06  | 3E+06  | 0.061 | 0.052 | 0.015 | 0.038 | 0.015 | 0.038 | 0.036 | 0.564 | 0.018 | 0.056 | 0.893 |
| SMc00693  | RHH     | 91 aa  | 3E+06  | 3E+06  | 0.093 | 0.063 | 0.053 | 0.156 | 0.053 | 0.156 | 0.009 | 0.120 | 0.107 | 0.065 | 0.875 |
| SMc00407  | COG3832 | 230 aa | 358400 | 359092 | 0.077 | 0.298 | 0.092 | 0.029 | 0.092 | 0.029 | 0.069 | 0.079 | 0.091 | 0.015 | 0.869 |
| SMa0453   | PIN     | 135 aa | 243155 | 243562 | 0.040 | 0.052 | 0.044 | 0.095 | 0.044 | 0.095 | 0.235 | 0.202 | 0.033 | 0.021 | 0.861 |
| SMc04221  | GNAT    | 174 aa | 2E+06  | 2E+06  | 0.088 | 0.059 | 0.064 | 0.107 | 0.064 | 0.107 | 0.074 | 0.145 | 0.065 | 0.059 | 0.830 |
| SMa0191   | COG3832 | 176 aa | 105799 | 106329 | 0.120 | 0.278 | 0.020 | 0.075 | 0.020 | 0.075 | 0.059 | 0.121 | 0.018 | 0.016 | 0.801 |
| SMc05006  | AbrB    | 104 aa | 2E+06  | 2E+06  | 0.078 | 0.258 | 0.143 | 0.003 | 0.143 | 0.003 | 0.000 | 0.029 | 0.135 | 0.001 | 0.794 |
| SMc02757  | HipA    | 504 aa | 41974  | 43488  | 0.072 | 0.122 | 0.048 | 0.073 | 0.048 | 0.073 | 0.095 | 0.130 | 0.078 | 0.053 | 0.792 |
| S Mb20626 | Xre     | 328 aa | 2E+06  | 2E+06  | 0.030 | 0.031 | 0.017 | 0.044 | 0.017 | 0.044 | 0.160 | 0.324 | 0.052 | 0.052 | 0.769 |
| SMc03136  | PHD     | 81 aa  | 3E+06  | 3E+06  | 0.071 | 0.037 | 0.036 | 0.185 | 0.036 | 0.185 | 0.032 | 0.088 | 0.045 | 0.053 | 0.767 |
| S Mb22004 | RelE    | 130 aa | 132946 | 133338 | 0.191 | 0.128 | 0.045 | 0.078 | 0.045 | 0.078 | 0.063 | 0.042 | 0.063 | 0.026 | 0.759 |
| SMc02987  | PIN     | 147 aa | 3E+06  | 3E+06  | 0.037 | 0.073 | 0.057 | 0.095 | 0.057 | 0.095 | 0.068 | 0.162 | 0.075 | 0.041 | 0.759 |
| SMc00397  | GNAT    | 186 aa | 346867 | 347427 | 0.011 | 0.016 | 0.014 | 0.084 | 0.014 | 0.084 | 0.052 | 0.166 | 0.027 | 0.288 | 0.755 |
| SMc00739  | GNAT    | 160 aa | 3E+06  | 3E+06  | 0.034 | 0.039 | 0.015 | 0.045 | 0.015 | 0.045 | 0.082 | 0.411 | 0.033 | 0.029 | 0.747 |
| SMc03137  | PIN     | 153 aa | 3E+06  | 3E+06  | 0.029 | 0.051 | 0.047 | 0.198 | 0.047 | 0.198 | 0.029 | 0.030 | 0.047 | 0.060 | 0.736 |
| S Mb22021 | GNAT    | 84 aa  | 534745 | 534999 | 0.084 | 0.027 | 0.008 | 0.023 | 0.008 | 0.023 | 0.066 | 0.126 | 0.060 | 0.310 | 0.734 |
| S Mb20121 | RHH     | 91 aa  | 133283 | 133558 | 0.178 | 0.068 | 0.025 | 0.111 | 0.025 | 0.111 | 0.033 | 0.089 | 0.039 | 0.045 | 0.727 |
| SMa1455   | COG5654 | 172 aa | 802324 | 802842 | 0.030 |       | 0.038 | 0.067 | 0.038 | 0.067 | 0.134 | 0.260 | 0.051 | 0.043 | 0.727 |



|          |         |        |        |        |       |       |       |       |       |       |       |       |       |       |       |
|----------|---------|--------|--------|--------|-------|-------|-------|-------|-------|-------|-------|-------|-------|-------|-------|
| SMc05001 | HicB    | 96 aa  | 242774 | 243064 | 0.032 | 0.023 | 0.024 | 0.216 | 0.024 | 0.216 | 0.054 | 0.016 | 0.043 | 0.076 | 0.722 |
| SMc04313 | RelE    | 77 aa  | 2E+06  | 2E+06  | 0.022 | 0.052 | 0.029 | 0.010 | 0.029 | 0.010 | 0.033 | 0.251 | 0.096 | 0.185 | 0.716 |
| SMB20256 | COG3832 | 149 aa | 261442 | 261891 | 0.066 | 0.027 | 0.017 | 0.239 | 0.017 | 0.239 | 0.013 | 0.028 | 0.013 | 0.041 | 0.702 |
| SMA2151  | Xre     | 107 aa | 1E+06  | 1E+06  | 0.092 | 0.237 | 0.065 | 0.012 | 0.065 | 0.012 | 0.049 | 0.127 | 0.022 | 0.006 | 0.687 |
| SMc01748 | PHD     | 86 aa  | 3E+06  | 3E+06  | 0.069 | 0.051 | 0.042 | 0.050 | 0.042 | 0.050 | 0.069 | 0.073 | 0.115 | 0.123 | 0.684 |
| SMc02783 | Xre     | 125 aa | 8185   | 8562   | 0.073 | 0.112 | 0.057 | 0.016 | 0.057 | 0.016 | 0.074 | 0.227 | 0.043 | 0.007 | 0.682 |
| SMc00393 | PIN     | 141 aa | 343504 | 343929 | 0.070 | 0.065 | 0.055 | 0.065 | 0.055 | 0.065 | 0.050 | 0.040 | 0.179 | 0.030 | 0.676 |
| SMc00605 | COG3832 | 202 aa | 1E+06  | 1E+06  | 0.126 | 0.115 | 0.036 | 0.053 | 0.036 | 0.053 | 0.061 | 0.062 | 0.057 | 0.074 | 0.675 |
| SMc03840 | GNAT    | 185 aa | 4E+06  | 4E+06  | 0.061 | 0.084 | 0.058 | 0.007 | 0.058 | 0.007 | 0.058 | 0.273 | 0.064 | 0.003 | 0.673 |
| SMc01177 | PIN     | 132 aa | 2E+06  | 2E+06  | 0.118 | 0.087 | 0.072 | 0.100 | 0.072 | 0.100 | 0.020 | 0.026 | 0.041 | 0.025 | 0.660 |
| SMc02184 | Xre     | 89 aa  | 546632 | 546901 | 0.057 | 0.087 | 0.066 | 0.071 | 0.066 | 0.071 | 0.012 | 0.030 | 0.138 | 0.051 | 0.650 |
| SMB21511 | PIN     | 81 aa  | 1E+06  | 1E+06  | 0.025 | 0.003 | 0.004 | 0.027 | 0.004 | 0.027 | 0.018 | 0.185 | 0.023 | 0.321 | 0.636 |
| SMB20420 | COG3832 | 208 aa | 433992 | 434618 | 0.196 | 0.109 | 0.051 | 0.055 | 0.051 | 0.055 | 0.008 | 0.021 | 0.049 | 0.023 | 0.619 |
| SMA5001  | PIN     | 104 aa | 58298  | 58612  | 0.020 | 0.019 | 0.005 | 0.006 | 0.005 | 0.006 | 0.000 | 0.047 | 0.117 | 0.374 | 0.599 |
| SMA0545  | PIN     | 146 aa | 291198 | 291638 | 0.107 | 0.111 | 0.080 | 0.027 | 0.080 | 0.027 | 0.008 | 0.094 | 0.053 | 0.008 | 0.596 |
| SMB21128 | COG5654 | 184 aa | 766873 | 767427 | 0.024 | 0.019 | 0.090 | 0.018 | 0.090 | 0.018 | 0.085 | 0.089 | 0.062 | 0.068 | 0.563 |
| SMc01229 | GNAT    | 169 aa | 2E+06  | 2E+06  | 0.044 | 0.080 | 0.042 | 0.022 | 0.042 | 0.022 | 0.107 | 0.157 | 0.025 | 0.016 | 0.556 |
| SMc02887 | RHH     | 54 aa  | 242730 | 242894 | 0.019 | 0.005 | 0.018 | 0.195 | 0.018 | 0.195 | 0.035 | 0.006 | 0.017 | 0.045 | 0.553 |
| SMc04441 | HicA    | 62 aa  | 2E+06  | 2E+06  | 0.087 | 0.060 | 0.050 | 0.047 | 0.050 | 0.047 | 0.010 | 0.012 | 0.124 | 0.039 | 0.524 |
| SMB21475 | MazF    | 67 aa  | 1E+06  | 1E+06  | 0.015 | 0.111 | 0.054 | 0.001 | 0.054 | 0.001 | 0.000 | 0.023 | 0.240 | 0.016 | 0.515 |
| SMB21649 | Xre     | 313 aa | 2E+06  | 2E+06  | 0.025 | 0.029 | 0.012 | 0.022 | 0.012 | 0.022 | 0.164 | 0.202 | 0.013 | 0.013 | 0.515 |
| SMB21576 | ArsR    | 121 aa | 1E+06  | 1E+06  | 0.062 | 0.060 | 0.028 | 0.084 | 0.028 | 0.084 | 0.011 | 0.024 | 0.040 | 0.091 | 0.513 |
| SMB20835 | HEPN    | 331 aa | 627125 | 628120 | 0.150 | 0.089 | 0.009 | 0.031 | 0.009 | 0.031 | 0.000 | 0.057 | 0.055 | 0.056 | 0.488 |
| SMB20835 | MNT     | 331 aa | 627125 | 628120 | 0.150 | 0.089 | 0.009 | 0.031 | 0.009 | 0.031 | 0.000 | 0.057 | 0.055 | 0.056 | 0.488 |

| SMa2105  | Fic     | 406 aa | 1E+06  | 1E+06  | 0.061 | 0.058 | 0.017 | 0.032 | 0.017 | 0.032 | 0.015 | 0.145 | 0.055 | 0.048 | 0.482 |
|----------|---------|--------|--------|--------|-------|-------|-------|-------|-------|-------|-------|-------|-------|-------|-------|
| SMc04161 | COG3832 | 156 aa | 2E+06  | 2E+06  | 0.065 | 0.037 | 0.017 | 0.081 | 0.017 | 0.081 | 0.054 | 0.058 | 0.021 | 0.028 | 0.459 |
| SMc01610 | Xre     | 294 aa | 2E+06  | 2E+06  | 0.012 | 0.031 | 0.042 | 0.061 | 0.042 | 0.061 | 0.020 | 0.044 | 0.082 | 0.059 | 0.454 |
| SMa1749  | Xre     | 299 aa | 991460 | 992359 | 0.019 | 0.032 | 0.065 | 0.040 | 0.065 | 0.040 | 0.007 | 0.021 | 0.089 | 0.051 | 0.429 |
| SMc02657 | PIN     | 94 aa  | 1E+06  | 1E+06  | 0.054 | 0.106 | 0.053 | 0.008 | 0.053 | 0.008 | 0.000 | 0.024 | 0.117 | 0.005 | 0.428 |
| SMa1056  | ArsR    | 115 aa | 577474 | 577821 | 0.027 | 0.006 | 0.015 | 0.099 | 0.015 | 0.099 | 0.060 | 0.047 | 0.011 | 0.045 | 0.425 |
| SMc02226 | COG3832 | 157 aa | 587336 | 587809 | 0.076 | 0.111 | 0.059 | 0.030 | 0.059 | 0.030 | 0.011 | 0.009 | 0.020 | 0.013 | 0.418 |
| SMc04269 | HicB    | 153 aa | 2E+06  | 2E+06  | 0.060 | 0.044 | 0.052 | 0.040 | 0.052 | 0.040 | 0.004 | 0.031 | 0.050 | 0.040 | 0.413 |
| SMB20629 | RHH     | 92 aa  | 2E+06  | 2E+06  | 0.088 | 0.051 | 0.010 | 0.050 | 0.010 | 0.050 | 0.009 | 0.104 | 0.026 | 0.015 | 0.411 |
| SMc00036 | COG3832 | 206 aa | 1E+06  | 1E+06  | 0.079 | 0.082 | 0.047 | 0.019 | 0.047 | 0.019 | 0.003 | 0.027 | 0.051 | 0.010 | 0.385 |
| SMB20754 | COG2856 | 491 aa | 2E+06  | 2E+06  | 0.013 | 0.018 | 0.018 | 0.051 | 0.018 | 0.051 | 0.008 | 0.022 | 0.036 | 0.132 | 0.367 |
| SMB20754 | Xre     | 491 aa | 2E+06  | 2E+06  | 0.013 | 0.018 | 0.018 | 0.051 | 0.018 | 0.051 | 0.008 | 0.022 | 0.036 | 0.132 | 0.367 |
| SMa1497  | COG3832 | 215 aa | 825906 | 826553 | 0.063 | 0.049 | 0.020 | 0.014 | 0.020 | 0.014 | 0.078 | 0.074 | 0.021 | 0.008 | 0.360 |
| SMc02223 | Xre     | 218 aa | 584615 | 585271 | 0.042 | 0.049 | 0.029 | 0.018 | 0.029 | 0.018 | 0.043 | 0.063 | 0.057 | 0.010 | 0.359 |
| SMc02658 | AbrB    | 77 aa  | 1E+06  | 1E+06  | 0.035 | 0.035 | 0.040 | 0.012 | 0.040 | 0.012 | 0.010 | 0.074 | 0.080 | 0.007 | 0.344 |
| SMc04220 | ArsR    | 105 aa | 2E+06  | 2E+06  | 0.010 | 0.012 | 0.021 | 0.017 | 0.021 | 0.017 | 0.036 | 0.132 | 0.048 | 0.014 | 0.328 |
| SMc01636 | PHD     | 323 aa | 2E+06  | 2E+06  | 0.012 | 0.018 | 0.009 | 0.025 | 0.009 | 0.025 | 0.036 | 0.138 | 0.027 | 0.029 | 0.327 |
| SMB20608 | ArsR    | 112 aa | 2E+06  | 2E+06  | 0.151 | 0.082 | 0.013 | 0.024 | 0.013 | 0.024 | 0.000 | 0.003 | 0.011 | 0.003 | 0.324 |
| SMB21187 | Xre     | 276 aa | 936834 | 937664 | 0.044 | 0.027 | 0.033 | 0.030 | 0.033 | 0.030 | 0.022 | 0.030 | 0.051 | 0.014 | 0.314 |
| SMc00429 | Xre     | 269 aa | 377524 | 378333 | 0.024 | 0.021 | 0.025 | 0.046 | 0.025 | 0.046 | 0.008 | 0.026 | 0.048 | 0.041 | 0.309 |
| SMB20411 | PIN     | 82 aa  | 426694 | 426942 | 0.004 | 0.009 | 0.010 | 0.017 | 0.010 | 0.017 | 0.010 | 0.080 | 0.023 | 0.129 | 0.308 |
| SMa0592  | HipA    | 390 aa | 315280 | 316452 | 0.029 | 0.048 | 0.019 | 0.038 | 0.019 | 0.038 | 0.018 | 0.050 | 0.018 | 0.024 | 0.301 |
| SMB20607 | COG3832 | 154 aa | 2E+06  | 2E+06  | 0.049 | 0.044 | 0.023 | 0.052 | 0.023 | 0.052 | 0.007 | 0.019 | 0.016 | 0.012 | 0.296 |
| SMB21419 | Xre     | 295 aa | 1E+06  | 1E+06  | 0.073 | 0.023 | 0.014 | 0.023 | 0.014 | 0.023 | 0.043 | 0.032 | 0.019 | 0.020 | 0.283 |

|          |         |        |        |        |       |       |       |       |       |       |       |       |       |       |       |
|----------|---------|--------|--------|--------|-------|-------|-------|-------|-------|-------|-------|-------|-------|-------|-------|
| SMa1822  | Xre     | 303 aa | 1E+06  | 1E+06  | 0.151 | 0.017 | 0.015 | 0.010 | 0.015 | 0.010 | 0.008 | 0.018 | 0.024 | 0.009 | 0.277 |
| SMc00097 | COG3832 | 219 aa | 1E+06  | 1E+06  | 0.023 | 0.041 | 0.034 | 0.020 | 0.034 | 0.020 | 0.037 | 0.016 | 0.035 | 0.005 | 0.267 |
| SMa0594  | Xre     | 343 aa | 316428 | 317459 | 0.034 | 0.030 | 0.024 | 0.034 | 0.024 | 0.034 | 0.016 | 0.020 | 0.019 | 0.027 | 0.262 |
| SMB21559 | Xre     | 296 aa | 1E+06  | 1E+06  | 0.074 | 0.021 | 0.013 | 0.018 | 0.013 | 0.018 | 0.015 | 0.043 | 0.014 | 0.021 | 0.249 |
| SMB21153 | GNAT    | 166 aa | 898009 | 898509 | 0.045 | 0.023 | 0.016 | 0.030 | 0.016 | 0.030 | 0.021 | 0.037 | 0.016 | 0.012 | 0.246 |
| SMc04387 | Xre     | 182 aa | 4E+06  | 4E+06  | 0.021 | 0.038 | 0.026 | 0.012 | 0.026 | 0.012 | 0.017 | 0.020 | 0.048 | 0.023 | 0.244 |
| SMc02609 | Xre     | 324 aa | 102517 | 103491 | 0.031 | 0.020 | 0.046 | 0.028 | 0.046 | 0.028 | 0.002 | 0.015 | 0.017 | 0.007 | 0.239 |
| SMB20215 | Xre     | 326 aa | 222993 | 223973 | 0.024 | 0.018 | 0.021 | 0.027 | 0.021 | 0.027 | 0.012 | 0.020 | 0.023 | 0.023 | 0.216 |
| SMa2319  | COG3832 | 215 aa | 1E+06  | 1E+06  | 0.010 | 0.003 | 0.009 | 0.027 | 0.009 | 0.027 | 0.002 | 0.032 | 0.029 | 0.067 | 0.216 |
| SMc02647 | ArsR    | 137 aa | 1E+06  | 1E+06  | 0.025 | 0.015 | 0.014 | 0.011 | 0.014 | 0.011 | 0.017 | 0.085 | 0.015 | 0.009 | 0.215 |
| SMa1725  | Xre     | 331 aa | 972775 | 973770 | 0.033 | 0.023 | 0.016 | 0.028 | 0.016 | 0.028 | 0.005 | 0.015 | 0.024 | 0.024 | 0.214 |
| SMc04321 | COG3832 | 224 aa | 2E+06  | 2E+06  | 0.064 | 0.026 | 0.006 | 0.025 | 0.006 | 0.025 | 0.023 | 0.013 | 0.011 | 0.014 | 0.213 |
| SMa1825  | Xre     | 302 aa | 1E+06  | 1E+06  | 0.046 | 0.029 | 0.011 | 0.008 | 0.011 | 0.008 | 0.028 | 0.028 | 0.025 | 0.014 | 0.208 |
| SMa2315  | MNT     | 179 aa | 1E+06  | 1E+06  | 0.027 | 0.038 | 0.010 | 0.035 | 0.010 | 0.035 | 0.008 | 0.023 | 0.013 | 0.008 | 0.206 |
| SMc01149 | COG3832 | 160 aa | 402694 | 403176 | 0.021 | 0.014 | 0.009 | 0.052 | 0.009 | 0.052 | 0.016 | 0.006 | 0.008 | 0.013 | 0.200 |
| SMa2133  | Xre     | 263 aa | 1E+06  | 1E+06  | 0.045 | 0.027 | 0.009 | 0.023 | 0.009 | 0.023 | 0.010 | 0.019 | 0.014 | 0.019 | 0.197 |
| SMc00383 | COG3832 | 228 aa | 337026 | 337712 | 0.015 | 0.039 | 0.032 | 0.018 | 0.032 | 0.018 | 0.007 | 0.018 | 0.014 | 0.002 | 0.195 |
| SMc00351 | Xre     | 197 aa | 306948 | 307541 | 0.016 | 0.034 | 0.016 | 0.012 | 0.016 | 0.012 | 0.011 | 0.004 | 0.050 | 0.014 | 0.184 |
| SMa1823  | Xre     | 302 aa | 1E+06  | 1E+06  | 0.050 | 0.041 | 0.006 | 0.006 | 0.006 | 0.006 | 0.006 | 0.019 | 0.025 | 0.010 | 0.175 |
| SMc02865 | GNAT    | 156 aa | 218732 | 219202 | 0.009 | 0.026 | 0.016 | 0.004 | 0.016 | 0.004 | 0.022 | 0.044 | 0.028 | 0.002 | 0.171 |
| SMa1476  | Xre     | 318 aa | 811255 | 812211 | 0.029 | 0.015 | 0.016 | 0.008 | 0.016 | 0.008 | 0.014 | 0.015 | 0.030 | 0.016 | 0.166 |
| SMa0286  | COG2442 | 153 aa | 159590 | 160051 | 0.022 | 0.018 | 0.023 | 0.011 | 0.023 | 0.011 | 0.000 | 0.012 | 0.034 | 0.003 | 0.156 |
| SMa1253  | MNT     | 89 aa  | 686450 | 686719 | 0.015 | 0.000 | 0.004 | 0.006 | 0.004 | 0.006 | 0.016 | 0.061 | 0.022 | 0.015 | 0.148 |
| SMc00558 | Xre     | 285 aa | 1E+06  | 1E+06  | 0.017 | 0.011 | 0.004 | 0.019 | 0.004 | 0.019 | 0.000 | 0.022 | 0.021 | 0.027 | 0.145 |

|          |         |        |        |        |       |       |       |       |       |       |       |       |       |       |       |
|----------|---------|--------|--------|--------|-------|-------|-------|-------|-------|-------|-------|-------|-------|-------|-------|
| SMc00089 | Xre     | 118 aa | 1E+06  | 1E+06  | 0.011 | 0.034 | 0.007 | 0.015 | 0.007 | 0.015 | 0.025 | 0.004 | 0.014 | 0.009 | 0.142 |
| SMc03170 | Xre     | 279 aa | 3E+06  | 3E+06  | 0.029 | 0.013 | 0.012 | 0.005 | 0.012 | 0.005 | 0.002 | 0.035 | 0.014 | 0.013 | 0.141 |
| SMc00769 | COG2856 | 470 aa | 781497 | 782909 | 0.006 | 0.010 | 0.008 | 0.028 | 0.008 | 0.028 | 0.009 | 0.012 | 0.014 | 0.010 | 0.132 |
| SMc00769 | Xre     | 470 aa | 781497 | 782909 | 0.006 | 0.010 | 0.008 | 0.028 | 0.008 | 0.028 | 0.009 | 0.012 | 0.014 | 0.010 | 0.132 |
| SMa5008  | RelE    | 73 aa  | 750238 | 750459 | 0.005 | 0.010 | 0.013 | 0.002 | 0.013 | 0.002 | 0.026 | 0.027 | 0.018 | 0.008 | 0.122 |
| SMc00352 | GNAT    | 175 aa | 307543 | 308070 | 0.014 | 0.019 | 0.011 | 0.007 | 0.011 | 0.007 | 0.000 | 0.014 | 0.032 | 0.003 | 0.116 |
| SMB21509 | RHH     | 170 aa | 1E+06  | 1E+06  | 0.020 | 0.004 | 0.005 | 0.010 | 0.005 | 0.010 | 0.000 | 0.017 | 0.016 | 0.027 | 0.115 |
| SMc01238 | COG3832 | 212 aa | 2E+06  | 2E+06  | 0.022 | 0.013 | 0.013 | 0.006 | 0.013 | 0.006 | 0.014 | 0.019 | 0.004 | 0.002 | 0.112 |
| SMa2163  | Xre     | 293 aa | 1E+06  | 1E+06  | 0.005 | 0.009 | 0.007 | 0.009 | 0.007 | 0.009 | 0.008 | 0.014 | 0.021 | 0.023 | 0.112 |
| SMa2279  | COG5654 | 160 aa | 1E+06  | 1E+06  | 0.011 | 0.008 | 0.005 | 0.004 | 0.005 | 0.004 | 0.000 | 0.000 | 0.024 | 0.051 | 0.111 |
| SMB21476 | MazF    | 115 aa | 1E+06  | 1E+06  | 0.016 | 0.006 | 0.009 | 0.004 | 0.009 | 0.004 | 0.009 | 0.011 | 0.013 | 0.016 | 0.098 |
| SMc01462 | GNAT    | 153 aa | 2E+06  | 2E+06  | 0.031 | 0.005 | 0.001 | 0.002 | 0.001 | 0.002 | 0.005 | 0.031 | 0.015 | 0.004 | 0.097 |
| SMa0285  | PIN     | 74 aa  | 159165 | 159389 | 0.000 | 0.027 | 0.009 | 0.004 | 0.009 | 0.004 | 0.000 | 0.023 | 0.006 | 0.004 | 0.085 |
| SMc00377 | Xre     | 263 aa | 330891 | 331682 | 0.013 | 0.013 | 0.006 | 0.002 | 0.006 | 0.002 | 0.006 | 0.001 | 0.030 | 0.003 | 0.083 |
| SMB21510 | PIN     | 41 aa  | 1E+06  | 1E+06  | 0.016 | 0.012 | 0.005 | 0.012 | 0.005 | 0.012 | 0.000 | 0.008 | 0.006 | 0.005 | 0.082 |
| SMc04436 | RelE    | 92 aa  | 2E+06  | 2E+06  | 0.004 | 0.019 | 0.006 | 0.001 | 0.006 | 0.001 | 0.018 | 0.000 | 0.012 | 0.010 | 0.077 |
| SMc02710 | Fic     | 302 aa | 3E+06  | 3E+06  | 0.005 | 0.004 | 0.002 | 0.003 | 0.002 | 0.003 | 0.021 | 0.027 | 0.003 | 0.003 | 0.072 |
| SMB20005 | COG3832 | 203 aa | 8289   | 8900   | 0.010 | 0.001 | 0.003 | 0.008 | 0.003 | 0.008 | 0.008 | 0.022 | 0.000 | 0.005 | 0.067 |
| SMa1770  | RelE    | 57 aa  | 1E+06  | 1E+06  | 0.003 | 0.000 | 0.000 | 0.000 | 0.000 | 0.000 | 0.000 | 0.000 | 0.040 | 0.017 | 0.060 |
| SMB21336 | Xre     | 314 aa | 1E+06  | 1E+06  | 0.008 | 0.004 | 0.003 | 0.002 | 0.003 | 0.002 | 0.005 | 0.017 | 0.007 | 0.008 | 0.060 |
| SMB20859 | Xre     | 316 aa | 1E+06  | 1E+06  | 0.009 | 0.006 | 0.004 | 0.003 | 0.004 | 0.003 | 0.011 | 0.008 | 0.007 | 0.004 | 0.057 |
| SMa0319  | Xre     | 333 aa | 177973 | 178974 | 0.020 | 0.011 | 0.002 | 0.002 | 0.002 | 0.002 | 0.000 | 0.008 | 0.005 | 0.002 | 0.054 |
| SMc01210 | HEPN    | 57 aa  | 2E+06  | 2E+06  | 0.000 | 0.000 | 0.002 | 0.001 | 0.002 | 0.001 | 0.000 | 0.021 | 0.005 | 0.009 | 0.039 |
| SMa2281  | COG5642 | 110 aa | 1E+06  | 1E+06  | 0.009 | 0.002 | 0.004 | 0.003 | 0.004 | 0.003 | 0.000 | 0.000 | 0.010 | 0.002 | 0.038 |

|          |         |        |        |        |       |       |       |       |       |       |       |       |       |       |       |
|----------|---------|--------|--------|--------|-------|-------|-------|-------|-------|-------|-------|-------|-------|-------|-------|
| SMb21670 | COG3832 | 128 aa | 1E+06  | 1E+06  | 0.000 | 0.008 | 0.001 | 0.001 | 0.001 | 0.001 | 0.006 | 0.012 | 0.000 | 0.006 | 0.037 |
| SMb20222 | Xre     | 140 aa | 229750 | 230172 | 0.012 | 0.002 | 0.001 | 0.004 | 0.001 | 0.004 | 0.000 | 0.005 | 0.000 | 0.005 | 0.036 |
| SMa0917  | MazFn   | 108 aa | 509885 | 510211 | 0.006 | 0.002 | 0.001 | 0.000 | 0.001 | 0.000 | 0.000 | 0.004 | 0.002 | 0.007 | 0.024 |
